# Supplementary material
Source: Elsevier journal article supplement (https://www.sciencedirect.com/science/article/pii/S2254887418300894)
Supplement: mmc1 [file S2254887418300894:mmc1.pdf]

## **Anexo. Casos Clínicos**

### **Caso 1**

Mujer de 78 años que ingresa de forma programada para intervención de prótesis de cadera.

Antecedentes personales: HTA controlada con dos fármacos. Obesidad (peso 96 kg). Enfermedad renal crónica (ERC) estadio 4 (filtrado glomerular de 25 ml/min). Fibrilación auricular (FA) no valvular permanente. Anticoagulada desde hace 5 años, Hace 3 años tuvo un ictus isquémico sin secuelas, hace 2 años tuvo una hemorragia digestiva baja (HDB) por angiodisplasia de colon que se trató endoscópicamente. Situación funcional: autónoma para las actividades de la vida diaria (ABVD), muy sedentaria. Realiza tratamiento con apixaban 2,5 mg cada 12 horas.

### **Caso 2**

Paciente de 76 años que ingresa por hemorragia digestiva alta (HDA).

Antecedentes personales: Cirrosis hepática etílica sin descompensaciones hasta la fecha. Actualmente abstinentes. Anticoagulado con acenocumarol de forma indefinida por trombosis venosa profunda (TVP) proximal de miembro inferior izquierdo (MII) recurrente. Se realiza en urgencias una endoscopia que muestra una variz esofágica sangrante que se trata endoscópicamente mediante ligadura. A su ingreso en planta está hemodinámicamente estable, en análisis de sangre: hemoglobina 10 g/dl, plaquetas 105000/mm<sup>3</sup> e INR de 2,2.

### **Caso 3**

Varón de 50 años que ingresa tras consultar por aumento del perímetro y dolor abdominal.

Antecedentes personales. Bebedor actual de unos 40 g de alcohol al día. Fumador de unos 10 cigarrillos al día. No hipertensión arterial (HTA). No diabetes mellitus (DM). No dislipemia (DLP). Cirrosis hepática etílica estadio Child-Pugh C con ingresos previos por descompensación ictero-hidrópica. TVP en MII hace 5 años. ERC estadio 4 (filtrado glomerular 25 ml/min). Situación basal: autónomo para las ABVD. Funciones superiores conservadas. Vive con su esposa. Realiza tratamiento domiciliario con espironolactona y un betabloqueante.

Enfermedad actual: El paciente es diagnosticado de descompensación hidrópica y trombosis venosa portal. Plaquetas 98.000/mm<sup>3</sup> INR 1,39.

#### **Caso 4**

Varón de 76 años que ingresa tras consultar por palpitaciones.

Antecedentes personales: Exbebedor de unos 40 g de alcohol al día. Exfumador de unos 20 cigarrillos/día. HTA. DM tipo 2. No DLP. Cirrosis hepática etílica estadio Child-Pugh A, sin ingresos previos. Infarto agudo de miocardio (IAM) inferior hace 5 años sin realizarse revascularización coronaria. ERC estadio 4 (filtrado glomerular 29 ml/min). Autónomo para las ABVD. Funciones superiores conservadas. Vive con su esposa. Realiza tratamiento con: ácido acetil salicílico (AAS) 100 mg/día, ramipril 5 mg/ día, bisoprolol 5 mg/día., Insulina glargina 12 UI/día.

Enfermedad actual: El paciente es diagnosticado de FA de duración incierta.

#### **Caso 5**

Mujer de 79 años que ingresa por melenas.

Antecedentes personales. En tratamiento con AAS 100 mg/día por cardiopatía isquémica con expresión de síndrome coronario agudo sin elevación del segmento ST (SCASEST) 5 años antes. TVP femoral derecha de origen idiopático hace 5 meses. Anticoagulada con acenocumarol con controles en más del 80% de las ocasiones en rango. Angiodisplasias gástricas con sangrado hace 3 meses precisando transfusión de dos concentrados de hematíes por ángor hemodinámico.

Enfermedad actual: Ingresa por melenas en el contexto de toma de antiinflamatorios no esteroideos (AINEs) por lumbociática. Sangrado sin repercusión biológica ni hemodinámica, que no precisa transfusión.

#### **Caso 6**

Varón de 72 años que consulta por palpitaciones.

Antecedentes personales. Sin alergias medicamentosas. HTA con mal control y en tratamiento con 3 fármacos. Hepatopatía en fase cirrótica por el virus de la hepatitis B, con datos de hipertensión portal. Realiza tratamiento con furosemida 40 mg al día y propranolol 20 mg cada 8 horas. Sin episodios de sangrado. Sin coagulopatía asociada. ERC estadio 4 de etiología vascular, en seguimiento en consultas de Nefrología.

Enfermedad actual: sensación intermitente de palpitaciones de unos 4-5 días de evolución, que se han hecho permanentes. A su llegada a Urgencias se constató FA a 130 latidos por minuto, sin disnea ni datos de insuficiencia cardiaca descompensada.

### **Caso 7**

Mujer de 76 años que ingresa por neumonía.

Antecedentes personales: Cirrosis estadio Child-Pugh B e INR basal 1,3. Presentó hace 4 meses una hemorragia intracraneal tras una caída accidental, resuelta espontáneamente. TVP femoral hace dos años.

Aceptable calidad de vida, pero muy sedentaria. El peso es de 60 kg.

Enfermedad actual: Ingresa por una neumonía. Su médico considera que el riesgo de enfermedad tromboembólica venosa (ETV) es elevado (puntuación PRETEMED de 5), con un riesgo hemorrágico considerable (puntuación HASBLED de 3). Se plantea realizar profilaxis de la ETV durante su ingreso y convalecencia

### **Caso 8**

Varón de 56 años que ingresa por neumonía

Antecedentes personales: HDA hace 2 años. ERC estadio 4. Doble antiagregación desde hace 2 meses tras angioplastia y endoprótesis vascular en la arteria renal por estenosis arteriosclerótica. Hace un año con motivo de un cateterismo presentó una TVP en la arteria basilar, que se resolvió en tres meses tras tratamiento con heparina de bajo peso molecular (HBPM). Aceptable calidad de vida. El peso es de 75 Kg.

Enfermedad actual: Ingresa por una neumonía. Su médico considera que el riesgo de ETV es elevado (puntuación PRETEMED de 4), con un riesgo hemorrágico considerable (puntuación HASBLED >3), aunque también valora que está protegido con la doble antiagregación, que ha de mantener un mes más tras la angioplastia. Se plantea realizar profilaxis ETV durante su ingreso y convalecencia

### **Caso 9**

Paciente de varón de 77 años que ingresa por disnea.

Antecedentes personales: Exfumador y exbebedor de alcohol. HTA con cardiopatía hipertensiva. FA permanente. Adenocarcinoma pulmonar en estadio 4, en seguimiento por Oncología. Cirrosis etílica, Child-Pugh A. TVP en miembro inferior derecho (MID) hace 2 años. ERC estadio 4 (filtrado glomerular de 29 ml/min). Situación basal: autónomo para ABVD, cognitivamente normal, buen apoyo familiar, sale a la calle a diario. La hija del paciente refiere que su Oncólogo le ha comentado que la supervivencia promedio de los pacientes en la situación de su familiar es de aproximadamente 6-12 meses. Realiza tratamiento habitual con: bisoprolol 2,5 mg/día, enalapril 20 mg/ día, furosemida 40 mg día.

Enfermedad actual: durante su ingreso el paciente es diagnosticado de insuficiencia cardíaca descompensada.

### **Caso 10**

Mujer de 76 años que consulta por debilidad en miembros inferiores.

Antecedentes personales: Obesidad (Peso 80 kg). HTA de larga evolución. DM tipo 2. Nefropatía y retinopatía. Neoplasia de mama en estadio 4, con progresión en los últimos meses a pesar de varias líneas de quimioterapia. ERC en estadio 4. Creatinina basal 1,8 mg/dl (filtrado glomerular estimado de 28 ml/min). TVP en MII hace 2 años. Poliartrosis invalidante. HDB de origen no aclarado hace un año. Situación basal: precisa ayuda para aseo y vestido, limitada por dolor osteomuscular. Cognitivamente bien. Vive con una hija. Realiza tratamiento con: HBPM a dosis profilácticas, fentanilo parches 25 mcg/72h, enalapril 20 mg/día, amlodipino 5 mg/día, omeprazol 20 mg/día e insulina glargina con dosis variable.

Enfermedad actual: durante su ingreso se diagnostica de compresión medular que se trata con esteroides y radioterapia.

### **Caso 11**

Varón de 78 años que ingresa por síntomas de infección respiratoria aguda

Antecedentes personales: HTA. DM tipo 2. Hipercolesterolemia. Ictus isquémico con graves secuelas funcionales: hemiplejía derecha, afasia y demencia vascular con deterioro cognitivo leve. Miocardiopatía isquémica con disfunción sistólica grave y fracción de eyección (FEVI) del 20%, en clase funcional III-IV de la NYHA. Realiza tratamiento antiagregante con AAS. Enfermedad pulmonar obstructiva crónica (EPOC) con obstrucción espirométrica grave, fenotipo bronquitis crónica y con insuficiencia respiratoria crónica parcial. ERC estadio 4, aclaramiento estimado de 28 ml/min. Situación basal: dependiente para las ABVD, régimen de vida cama-sillón, oxigenoterapia continua domiciliaria. Índice de Karnofsky basal del 40%. La hija refiere que su Internista ha comentado que la supervivencia promedio de los pacientes en la situación de su familiar es de unos tres meses.

Enfermedad actual: Durante su ingreso el paciente es diagnosticado de una exacerbación infecciosa de su EPOC e insuficiencia cardíaca descompensada. Se inicia tratamiento antibiótico empírico y se intensifica tratamiento broncodilatador.

### Caso 12

Varón de 65 años que ingresa por síncope tras cuadro de aumento de volumen de la pierna izquierda.

Antecedentes personales: HTA. Diabetes mellitus tipo 2 con afectación de órganos diana. Cirrosis hepática etílica estadio Child-Pugh A. Ex-bebedor excesivo. Miocardiopatía dilatada isquémica con enfermedad multivascular no revascularizable, angina refractaria y disfunción sistólica grave (FEVI del 20%). Insuficiencia cardíaca en clase funcional III-IV de la NYHA. Se ha desestimado trasplante cardíaco. Nefropatía diabética: ERC estadio 4, con aclaramiento estimado de 29 ml/min. Situación basal: limitación funcional importante por la disnea y la angina. Funciones superiores conservadas. Dependiente para algunas ABVD. La hija del paciente refiere que su Internista le ha comentado que la supervivencia promedio de los pacientes en la situación de su familiar es de aproximadamente 12 meses.

Enfermedad actual: A su ingreso se objetiva un INR de 1,6; se realiza un angio-TC con nefroprotección que muestra un tromboembolismo pulmonar (TEP) segmentario bilateral y una ecografía-doppler que muestra una TVP fémoro-poplíteo derecha. Durante el ingreso la función renal permanece estable.

### Caso 13

Varón de 77 años que ingresa por pancreatitis aguda.

Antecedentes personales: Exfumador y ex bebedor con cirrosis hepática estadio Child-Pugh A de origen etílico. Accidente cerebrovascular (ACV) hemorrágico tres años antes del que se recuperó sin secuelas. Se documentaron episodios de FA paroxística no valvular (puntuación CHA<sub>2</sub>DS<sub>2</sub>VASc = 2, puntuación HASBLED = 3), decidiéndose mantener sin tratamiento por el riesgo hemorrágico.

Enfermedad actual: ingresa por un episodio de pancreatitis aguda edematosa intersticial de origen biliar que evoluciona favorablemente sin complicaciones, permaneciendo ingresado nueve días durante los que recibió tratamiento con HBPM como profilaxis de la ETV. En el ingreso siempre en ritmo sinusal.

### Caso 14

Mujer de 70 años que ingresa por pancreatitis aguda

Antecedentes personales: Sin hábitos tóxicos. Diabetes mellitus tipo 2 en tratamiento con antidiabéticos orales. HTA que presentó una hemorragia intracraneal dos años antes tras ser anticoagulada por un accidente cerebrovascular isquémico transitorio (AIT) (puntuación CHA<sub>2</sub>DS<sub>2</sub>VASc = 6, puntuación HASBLED = 4), con FA paroxística. Presenta como secuela solo una discreta paresia en el brazo izquierdo. Desde entonces en tratamiento con aspirina.

Enfermedad actual: ingresa ahora en ritmo sinusal por una pancreatitis aguda necrotizante de origen litiasico, que evolucionó favorablemente, permaneciendo hospitalizada 15 días durante los que se retiró la aspirina y recibió tratamiento con HBPM como profilaxis de ETV.

### **Caso 15**

Mujer de 58 años que por neumonía adquirida de la comunidad (puntuación CURB-65 de 3 puntos).

Antecedentes personales: No hábitos tóxicos. Episodio de TVP hace 3 años relacionada con una fractura de maléolo externo (estuvo anticoagulada con warfarina durante seis meses). HTA esencial con crisis hipertensivas ocasionales. Hematoma talámico izquierdo de etiología hipertensiva hace un año, sin déficit neurológico residual. Cirrosis hepática por VHB estadio Child-Pugh A.

Enfermedad actual: al ingreso se detecta una FA paroxística el primer día con fiebre. El hemograma y estudio de coagulación al ingreso son normales.

### **Caso 16**

Mujer de 65 años que ingresa con el diagnóstico de TEP. El hemograma y estudio de coagulación al ingreso son normales. No hay datos de trombofilia.

Antecedentes personales: ERC estadio 4 con FG: 28ml/min. Hematoma talámico de etiología no filiada hace un año, sin déficit neurológico residual.

### **Caso 17**

Paciente de 78 años que ingresa por TVP

Antecedentes personales: FA no valvular desde hace 10 años. Anticoagulación oral, con warfarina, pero sufrió una hemorragia intracraneal (HIC) a los dos años, por lo que se le retiró la warfarina y se inició tratamiento antiagregante con AAS 100 mg/día.

Enfermedad actual: hace 15 días ha tenido un ictus isquémico con hemiparesia importante que le hace estar encamado. Dado el antecedente de HIC por anticoagulación previa, se decide aumentar la dosis de AAS a 300 mg/día y no anticoagular. Pero a los 7 días el paciente tiene un cuadro clínico de TVP distal de MII.

### **Caso 18**

Varón de 64 años que necesita ir al dentista para tratamiento odontológico, por lo que consulta la pauta ha de seguir con su tratamiento anticoagulante.

Antecedentes personales: sedentario por un ictus previo sufrido hace 2 años. Se le detectó una FA por lo que inició tratamiento con anticoagulante oral con acenocumarol. TVP hace 10 meses, ERC estadio 4 con creatinina basal de 2,5 mg/dl (aclaramiento estimado de 25ml/min).

### **Caso 19**

Mujer de 74 años y 90 kg de peso, diabética con aceptable calidad de vida que a raíz de una hemorragia digestiva baja que ocasiona ingreso y transfusión se le diagnostica de carcinoma de colon, en principio curado tras resección, aunque en pauta de bebazumab. Además se objetiva una trombopenia de  $98.000/\text{mm}^3$ , que se ha mantenido y una ERC con FG de 29 ml/min.

Se plantea realizar profilaxis ETV en paciente oncológica por el riesgo en la escala PRETEMED de 4. La paciente acepta la decisión que tome su médico.

## **Caso 20**

Mujer de 82 años y 70 kg de peso, con aceptable calidad de vida en FA no valvular desde hace años, anticoagulada con dicumarínicos, que hace seis meses presentó una HDB. Estando con controles estables de INR entre 2-3, se achacó la hemorragia a una trombopenia de 90.000/mm<sup>3</sup>, que se ha mantenido. En el estudio de hemorragia se observa masa en colon por lo que se decide realizar colonoscopia con biopsia. El endoscopista y anestesista solicitan preparar el estado de coagulación para dicha exploración y una eventual intervención.
